# Supplementary material for: An unprecedented water stable acylamide-functionalized metal–organic framework for highly efficient CH4/CO2 gas storage/separation and acid–base cooperative catalytic activity
Source: Royal Society of Chemistry journal article supplement (doi:10.1039/c8qi00662h), 2018-01-01
Supplement: c8qi00662h1.pdf [file c8qi00662h1.pdf]

## Electronic Supporting Information

# An unprecedentedly water stable acylamide-functionalized metal-organic framework for highly efficient CH<sub>4</sub>/CO<sub>2</sub> gas storage/separation and acid-base cooperative catalytic activity

Baishu Zheng,<sup>a</sup> Xin Luo,<sup>a</sup> Zhaoxu Wang,<sup>\*a</sup> Shaowei Zhang,<sup>a</sup> Ruirui Yun,<sup>\*b</sup> Lu Huang,<sup>a</sup> Wenjiang Zeng<sup>a</sup> and Wenlong Liu<sup>\*c</sup>

<sup>a</sup> Key Laboratory of Theoretical Organic Chemistry and Function Molecule of Ministry of Education, Hunan Provincial Key Laboratory of Controllable Preparation and Functional Application of Fine Polymers, School of Chemistry and Chemical Engineering, Hunan University of Science and Technology, Xiangtan, 411201, China. E-mail: hnust\_chem@163.com

<sup>b</sup> College of Chemistry and Materials Science, Anhui Normal University, Wuhu 241000, China. Email: ruirui58@ahnu.edu.cn

<sup>c</sup> College of Chemistry and Chemical Engineering, Yangzhou University, Yangzhou, 225002, China. E-mail: wlliu@yzu.edu.cn

### Materials and Methods

All chemical reagents were obtained from commercial sources and used without further

purification unless otherwise noted.  $^1\text{H}$  NMR spectra were recorded on a Bruker AVANCE III 500 MHz spectrometer with tetramethylsilane as an internal reference. Elemental analyses (C, H, and N) were performed on a Perkin-Elmer 240 analyzer. The IR spectra were recorded in the 400-4000  $\text{cm}^{-1}$  on a VECTOR TM 22 spectrometer using KBr pellets. Thermal gravimetric analysis (TGA) were performed under  $\text{N}_2$  atmosphere ( $100 \text{ mL}\cdot\text{min}^{-1}$ ) with a heating rate of  $5 \text{ K}\cdot\text{min}^{-1}$  using a 2960 SDT thermogravimetric analyzer. Powder X-ray diffraction (PXRD) data were collected on a Bruker D8 ADVANCE X-ray diffractometer using  $\text{Cu K}\alpha$  radiation ( $\lambda = 1.5418 \text{ \AA}$ ) at room temperature. Simulation of the PXRD spectrum was carried out by the single-crystal data and diffraction-crystal module of the Mercury program available free of charge *via* Internet at <http://www.ccdc.cam.ac.uk/products/mercury/>.

### **Activation of HNUST-8**

The solvent-exchanged HNUST-8 was prepared by immersing the as-synthesized sample firstly in dry methanol for 48 hours and then in dry  $\text{CH}_2\text{Cl}_2$  for another 48 hours to remove the non-volatile solvates (DMF and water), the extract was decanted every 8 hours and fresh methanol or  $\text{CH}_2\text{Cl}_2$  was replaced. The completely activated HNUST-8 sample was obtained by heating the solvent-exchanged sample at  $100 \text{ }^\circ\text{C}$  under a dynamic high vacuum for 24 hours. During this time, the pale blue sample changed to a deep purple-blue colour (Fig. S2), indicative of the presence of open copper(II) sites. The completely-activated samples were moisture sensitive and a few minutes of exposure to air could change the sample's color back to pale blue. Anal. Calcd (Found) for  $[\text{Cu}_2(\text{C}_{35}\text{H}_{19}\text{N}_3\text{O}_{10})]$ : C, 54.69 (54.65), H 2.49 (2.60), N 5.47 (5.39). The fully-activated samples were moisture sensitive and a few minutes of exposure to air could change the sample's color back to pale-blue. Selected IR (KBr,  $\text{cm}^{-1}$ , Fig. S11): 1664, 1604, 1517, 1366, 1107, 833, 772, 726.

### **Temperature-Programmed Desorption of $\text{NH}_3$ ( $\text{NH}_3$ -TPD)**

Activated sample (about 30 mg) was loaded in the center of the U-type cell. The system was then degassed at  $100 \text{ }^\circ\text{C}$  for 5 h. After the temperature cooled down,  $\text{NH}_3$  gas ( $30 \text{ mL}\cdot\text{min}^{-1}$ ) was introduced to pass through the cell for 30 minutes. In order to wash the free  $\text{NH}_3$ , the He gas ( $30 \text{ mL}\cdot\text{min}^{-1}$ ) was used to blow the cell for another 60 minutes. The  $\text{NH}_3$ -TPD data were collected using a heating rate of  $5 \text{ K}\cdot\text{min}^{-1}$  under He gas ( $30 \text{ mL}\cdot\text{min}^{-1}$ ).

### **Framework stability test**

As-synthesized HNUST-8 (about 800 mg) was collected from the mother liquor, washed with DMF, and then distributed equally in 4 vials containing 30 mL aqueous solution with different pH value of 3, 7 and 10, respectively (adjusted by HCl or NaOH). After immersion for 2 days at room temperature, the samples were collected by filtration and analyzed by PXRD. Similarly, after Deacetalization-Knoevenagel condensation reaction as a catalyst, HNUST-8 was collected by centrifugal separation, washed with methanol, and analyzed by PXRD. Moreover, to further check the chemical and water stability of HNUST-8, the HNUST-8 samples after treatment by aqueous solution with pH value of 3 and 10 were selected to collect the  $\text{N}_2$  sorption isotherms at 77 K.

**Table S1. Crystal data and structure refinement for HNUST-8.**

|                                         |                                                                                  |
|-----------------------------------------|----------------------------------------------------------------------------------|
| <b>Identification code</b>              | <b>HNUST-8</b>                                                                   |
| <b>CCDC number</b>                      | <b>1581346</b>                                                                   |
| <b>Empirical formula</b>                | <b>C<sub>35</sub> H<sub>17</sub> Cu<sub>2</sub> N<sub>3</sub> O<sub>11</sub></b> |
| <b>Formula weight</b>                   | <b>782.60</b>                                                                    |
| <b>Temperature</b>                      | <b>293(2) K</b>                                                                  |
| <b>Wavelength</b>                       | <b>0.71073 Å</b>                                                                 |
| <b>Crystal system</b>                   | <b>Cubic</b>                                                                     |
| <b>Space group</b>                      | <b>Im-3m</b>                                                                     |
| <i>a</i>                                | 36.244(8) Å                                                                      |
| <i>b</i>                                | 36.244(8) Å                                                                      |
| <i>c</i>                                | 36.244(8) Å                                                                      |
| <i>α</i>                                | 90°                                                                              |
| <i>β</i>                                | 90°                                                                              |
| <i>γ</i>                                | 90°                                                                              |
| <b>Volume</b>                           | <b>47611(18) Å<sup>3</sup></b>                                                   |
| <b>Z</b>                                | <b>24</b>                                                                        |
| <b>Density (calculated)</b>             | <b>0.655 g cm<sup>-3</sup></b>                                                   |
| <b>Absorption coefficient</b>           | <b>0.564 mm<sup>-1</sup></b>                                                     |
| <b>F(000)</b>                           | <b>9456</b>                                                                      |
| <b>Crystal size</b>                     | <b>0.24 x 0.20 x 0.16 mm</b>                                                     |
| <b>Theta range for data collection</b>  | <b>2.25 to 25.00 deg</b>                                                         |
| <b>Limiting indices</b>                 | <b>-43 ≤ <i>h</i> ≤ 42, -37 ≤ <i>k</i> ≤ 43, -43 ≤ <i>l</i> ≤ 43</b>             |
| <b>Reflections collected unique</b>     | <b>129764 / 3919 [R(int) = 0.0666]</b>                                           |
| <b>Completeness</b>                     | <b>99.0 %</b>                                                                    |
| <b>Absorption correction</b>            | <b>Semi-empirical from equivalents</b>                                           |
| <b>Max. and min. transmission</b>       | <b>0.9152 and 0.8765</b>                                                         |
| <b>Refinement method</b>                | <b>Full-matrix least-squares on F<sup>2</sup></b>                                |
| <b>Data / restraints / parameters</b>   | <b>3919 / 42 / 171</b>                                                           |
| <b>Goodness-of-fit on F<sup>2</sup></b> | <b>1.106</b>                                                                     |
| <b>Final R indices [I &gt; 2σ(I)]</b>   | <b>R1 = 0.0466, wR2<sup>a</sup> = 0.1309</b>                                     |
| <b>R indices (all data)</b>             | <b>R1 = 0.0560, wR2<sup>a</sup> = 0.1375</b>                                     |
| <b>Largest diff. peak and hole</b>      | <b>0.510 and -0.353 e. Å<sup>-3</sup></b>                                        |

$$^a R1 = \sum ||F_o| - |F_c|| / |F_o|; wR2 = [\sum w(\sum F_o^2 - F_c^2) / \sum w(F_o^2)]^{1/2}.$$

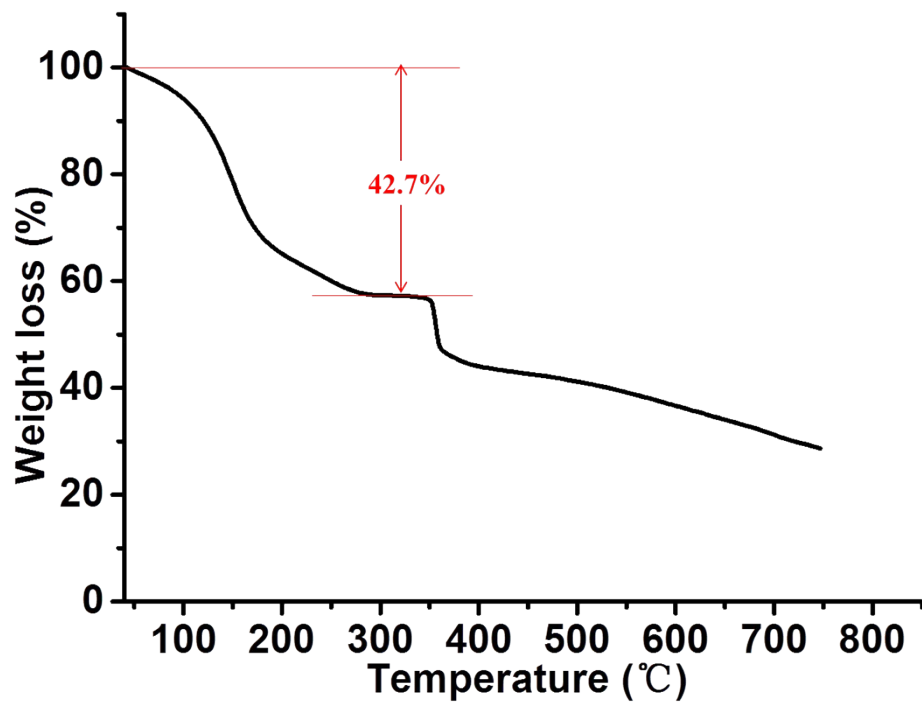

Fig. S1 TGA data of as-synthesized HNUST-8.

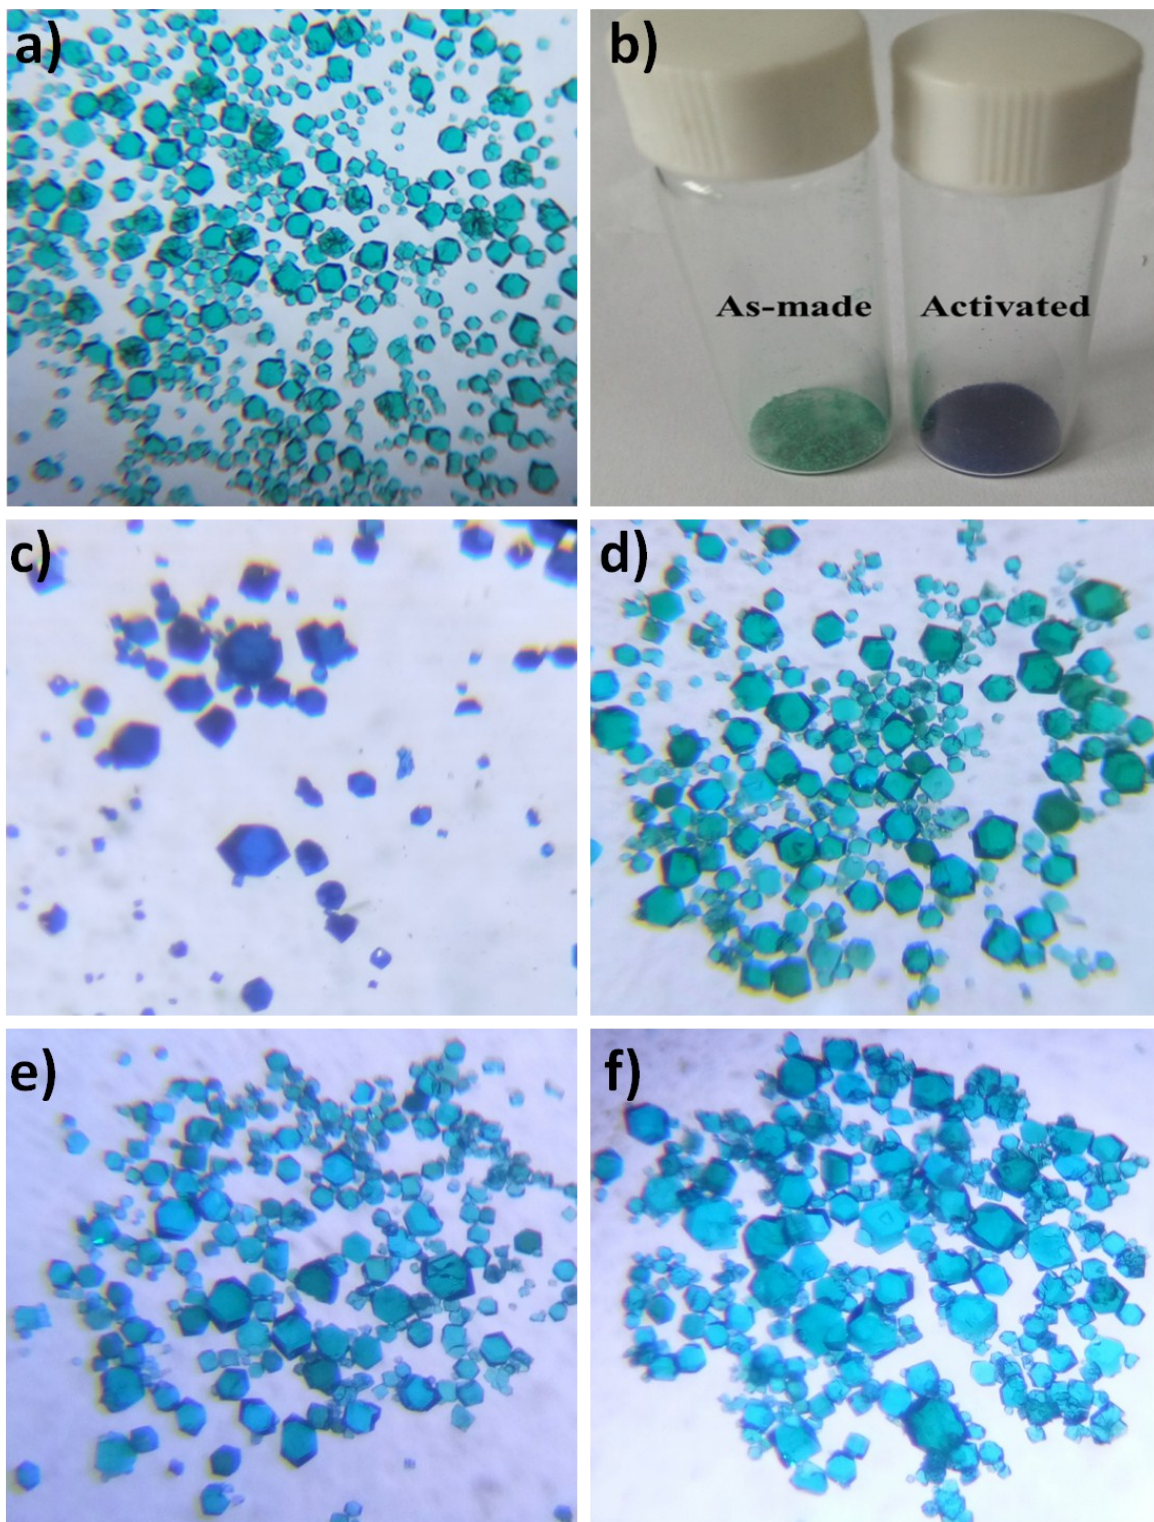

**Fig. S2** Photographic image of **HNUST-8**: a) as-synthesized in DMF, b) visual color change between as-synthesized and activated, c) activated in  $N_2$  atmosphere, d) firstly activated and then immersed in water for 2 days, e) firstly activated and then immersed in HCl solution ( $pH = 3$ ) for 2 days, f) firstly activated and then immersed in NaOH solution ( $pH = 10$ ) for 2 days. NOTE: the crystal size of **HNUST-8** has been magnified about 80-100 times.

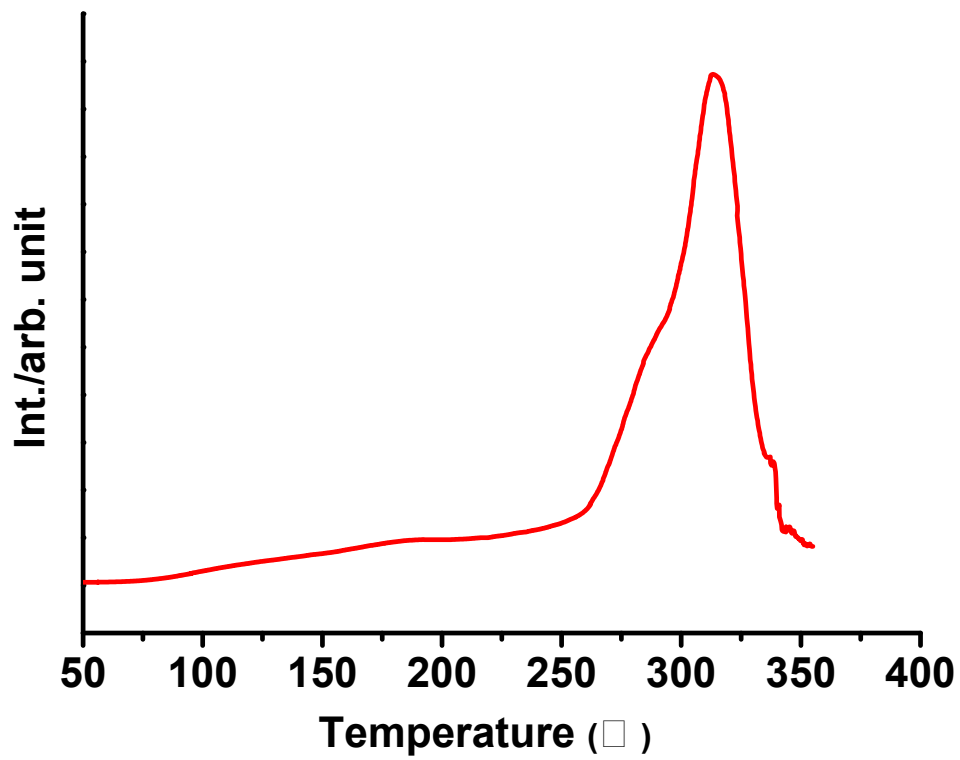

Fig. S3  $\text{NH}_3$ -TPD profile of HNUST-8.

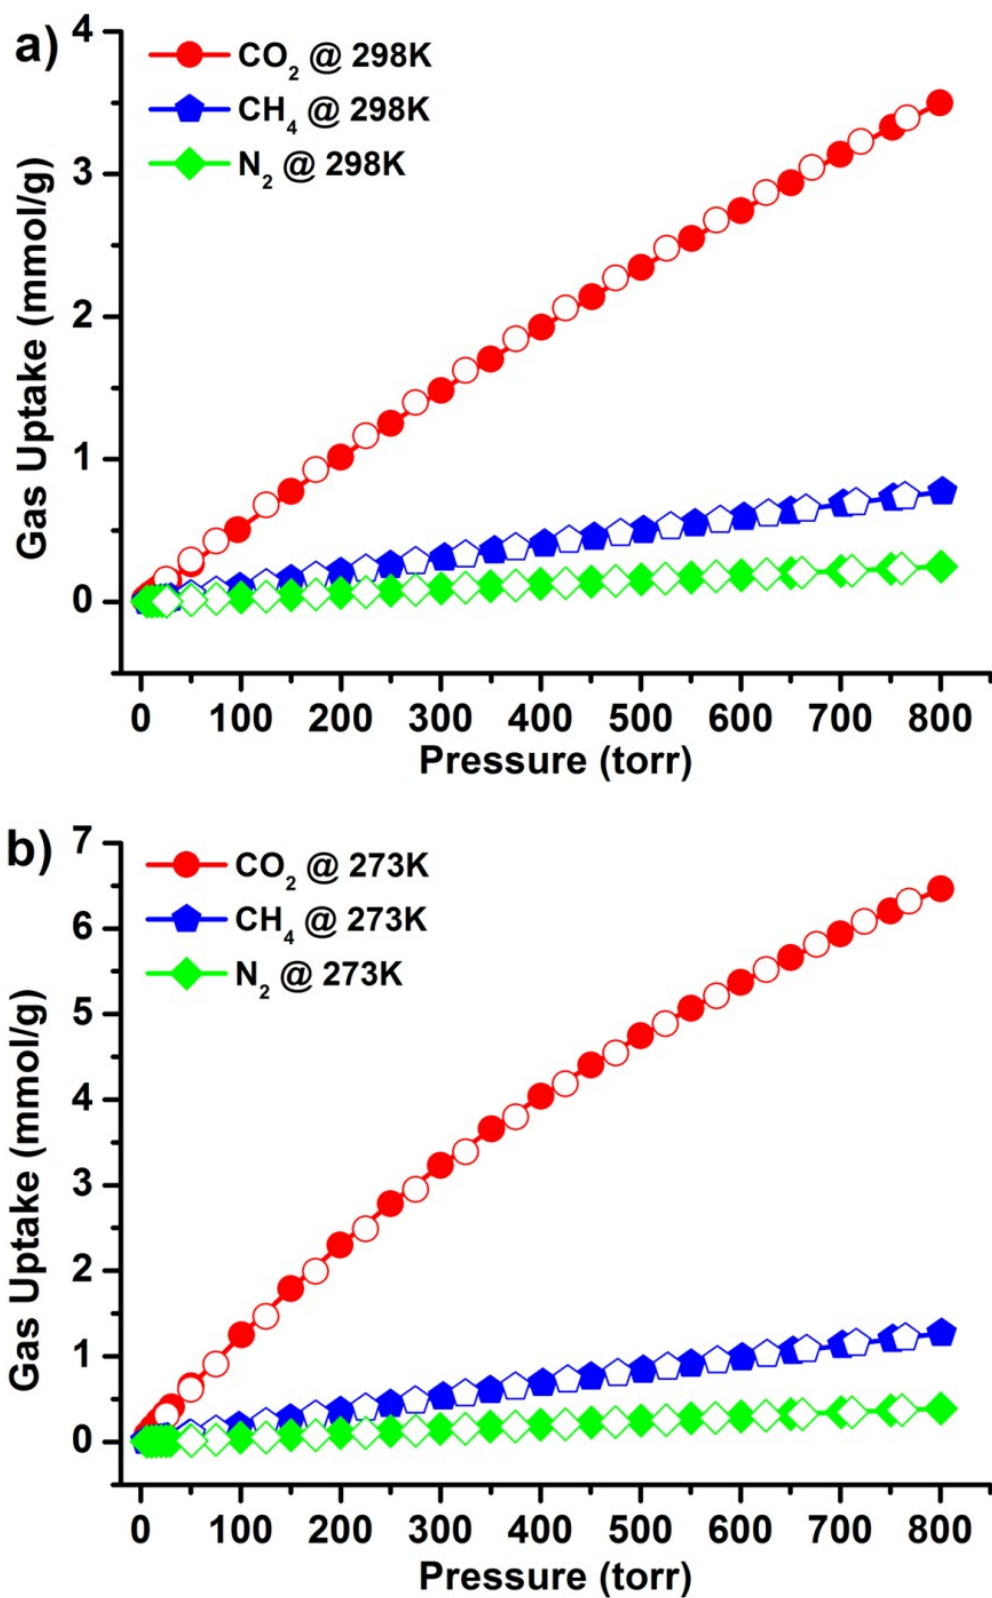

**Fig. S4** Low-pressure gas ( $\text{CO}_2$ ,  $\text{CH}_4$  and  $\text{N}_2$ ) sorption isotherms of HNUST-8 at 298 K and 273 K (filled symbols, adsorption; open symbols, desorption).

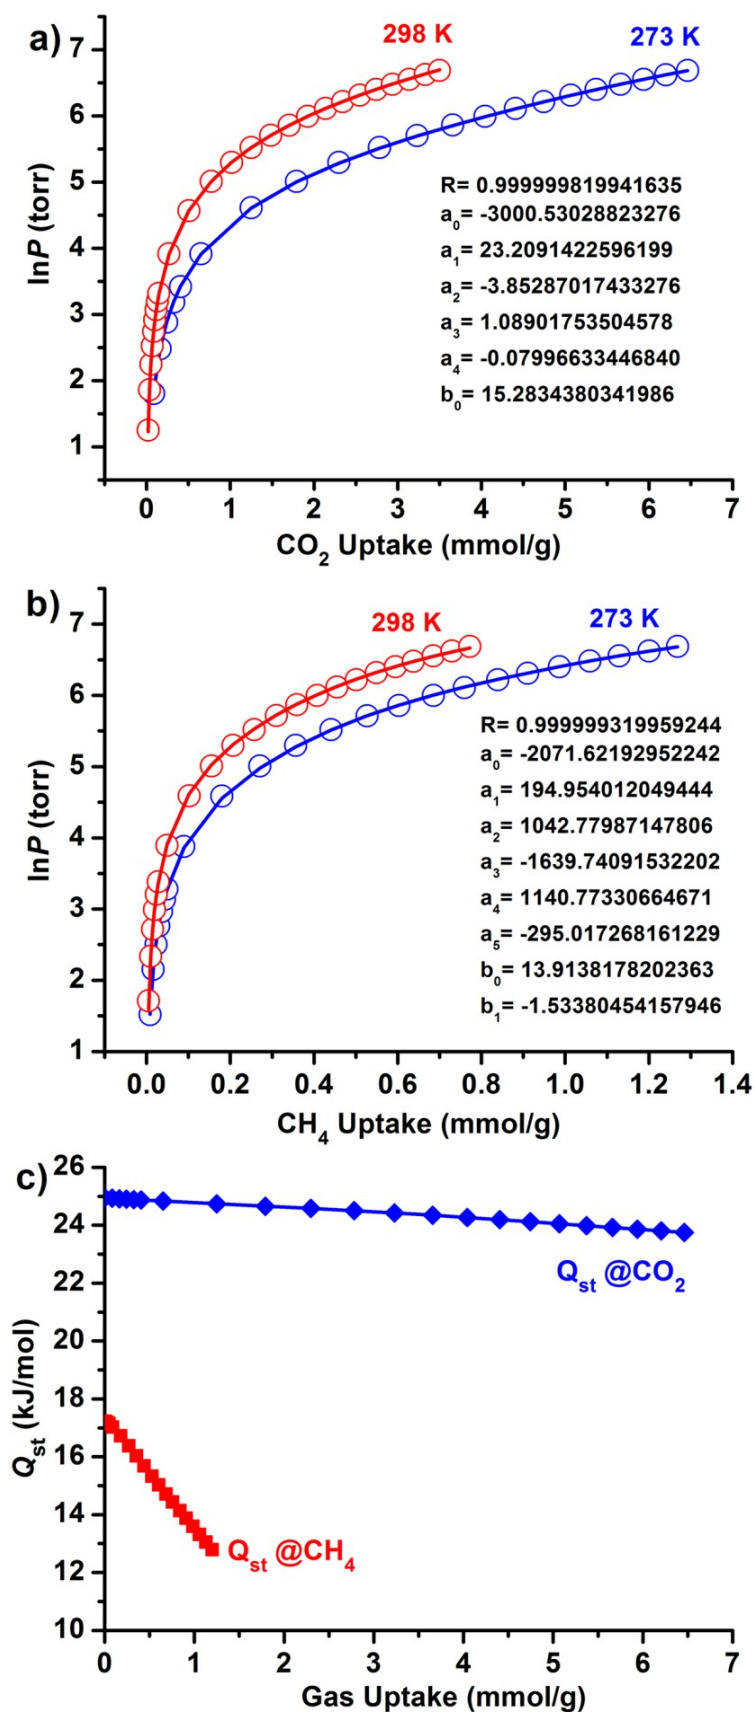

**Fig. S5** a-b) Details of virial equation (symbols) fitting to the experimental  $\text{CO}_2$  and  $\text{CH}_4$  adsorption data (solid lines) for **HNUST-8** collected at 273 K and 298 K; c) The  $\text{CO}_2$  and  $\text{CH}_4$  isosteric adsorption enthalpies of **HNUST-8**.



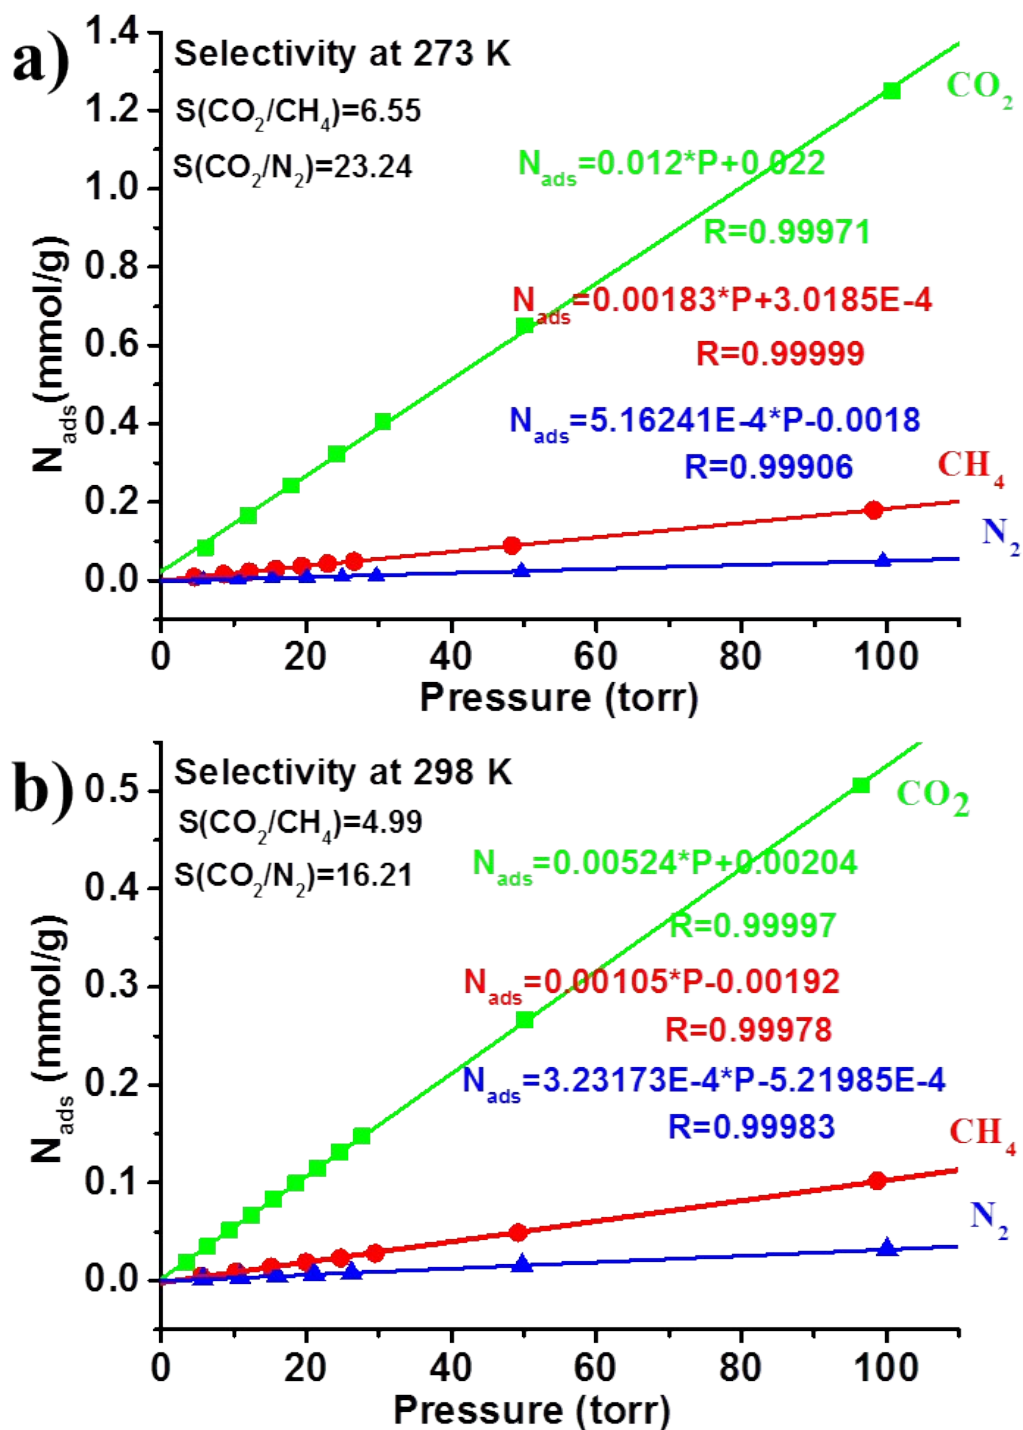

**Fig. S6** The fitting initial slope for CO<sub>2</sub>, CH<sub>4</sub> and N<sub>2</sub> isotherms for **HNUST-8** collected at 273 K and 298 K ( $N_{\text{ads}}$  = gas uptake;  $R$  = related coefficient). The calculated selectivity of CO<sub>2</sub>/CH<sub>4</sub> and CO<sub>2</sub>/N<sub>2</sub> is 6.55 and 23.24 at 273 K, 4.99 and 16.21 at 298 K, respectively.

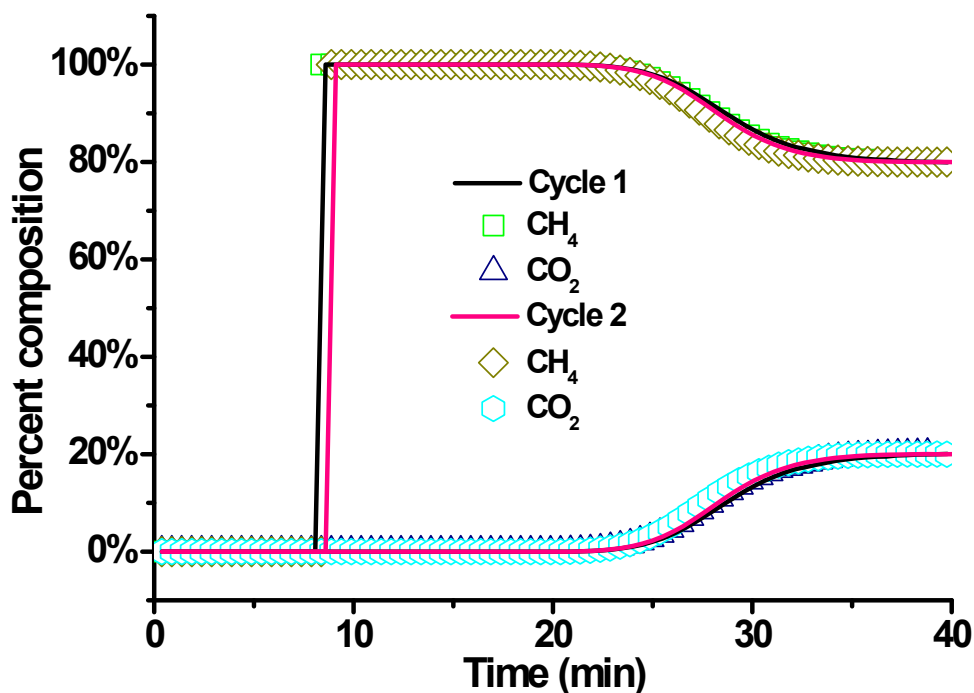

**Fig. S7** Repeated CO<sub>2</sub>/CH<sub>4</sub> breakthrough experiments of HNUST-8 after 20 min helium gas blowing at 298 K.

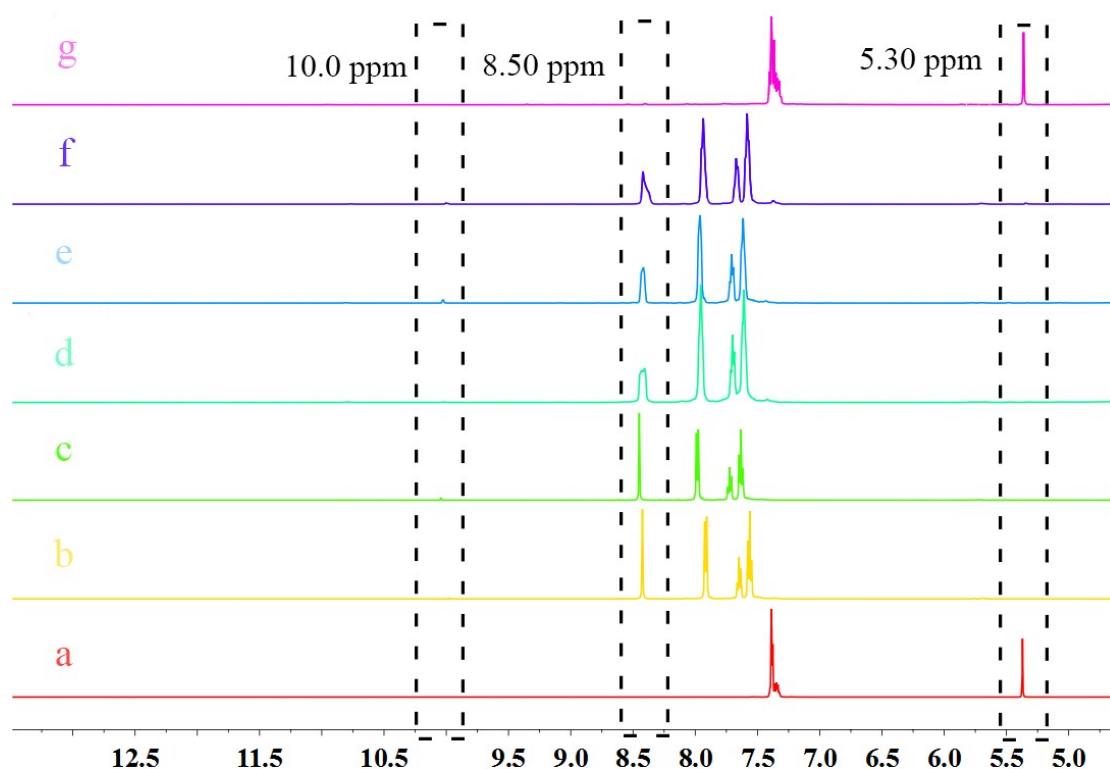

**Fig. S8** The <sup>1</sup>H NMR spectrum of a solution after the Deacetalization-Knoevenagel condensation: a) without catalyst, b) first cycle, c) second cycle, d) third cycle, e) fourth cycle, f) fifth cycle and g) control experiment in the presence of ethylenediamine. The yields of the reaction have been calculated by integration of benzylic protons at the end of the reaction, due to the distinct chemical shifts for the corresponding benzylic proton (the starting material **dimethoxymethylbenzene**: ~ 5.3 ppm, the intermediate **benzaldehyde**: ~ 10.0 ppm, and the final product **Benzylidene malononitrile**: ~ 8.5 ppm).

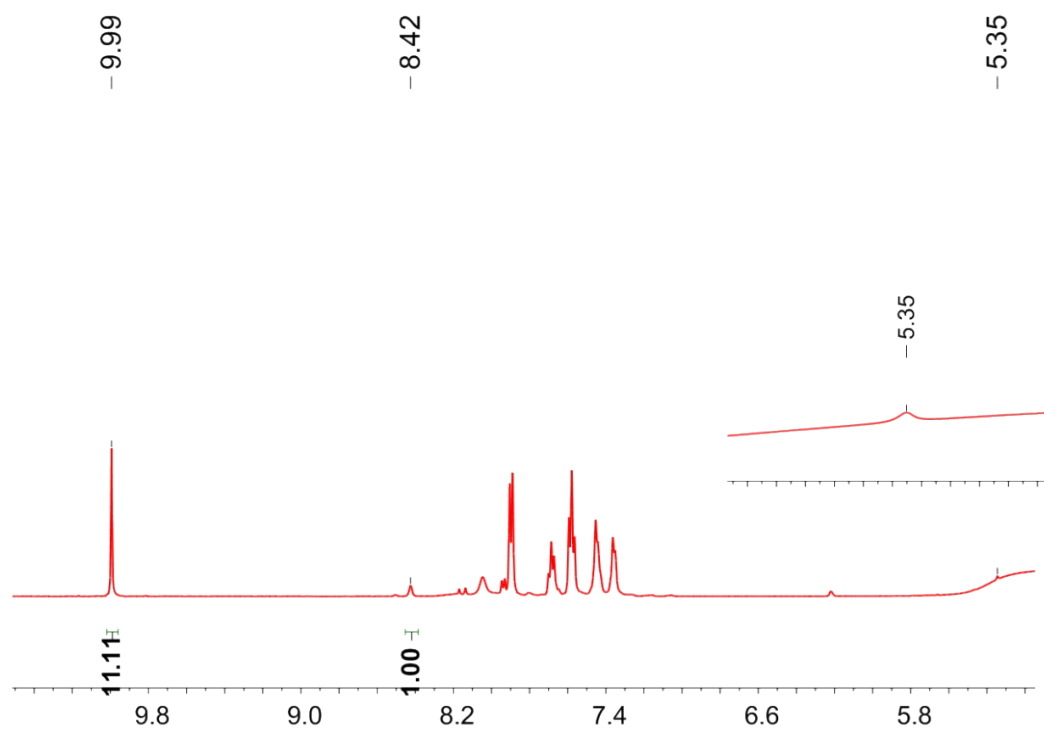

**Fig. S9** <sup>1</sup>H NMR spectrum of a solution after the Deacetalization-Knoevenagel condensation in acidic control reaction.

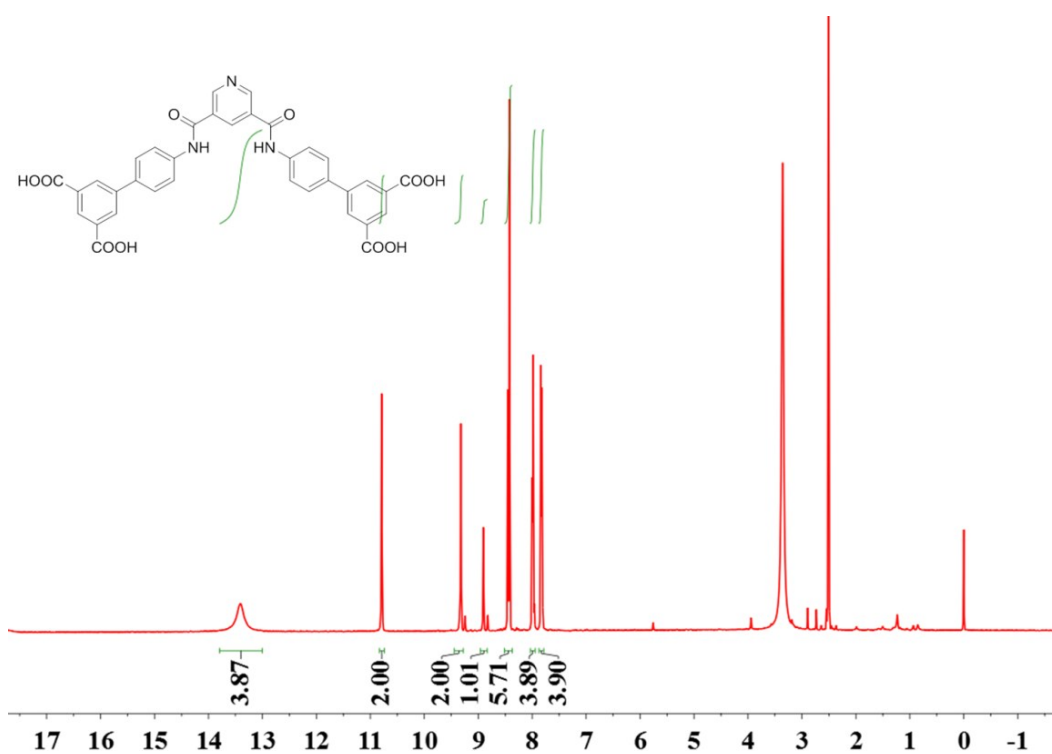

**Fig. S10** <sup>1</sup>H NMR spectrum of the ligand (PDBAD), 4,4'''-((pyridine-3,5-dicarbonyl)bis(azanediyl))bis((1,1'-biphenyl)-3,5-dicarboxylic acid) in DMSO-*d*<sub>6</sub>.

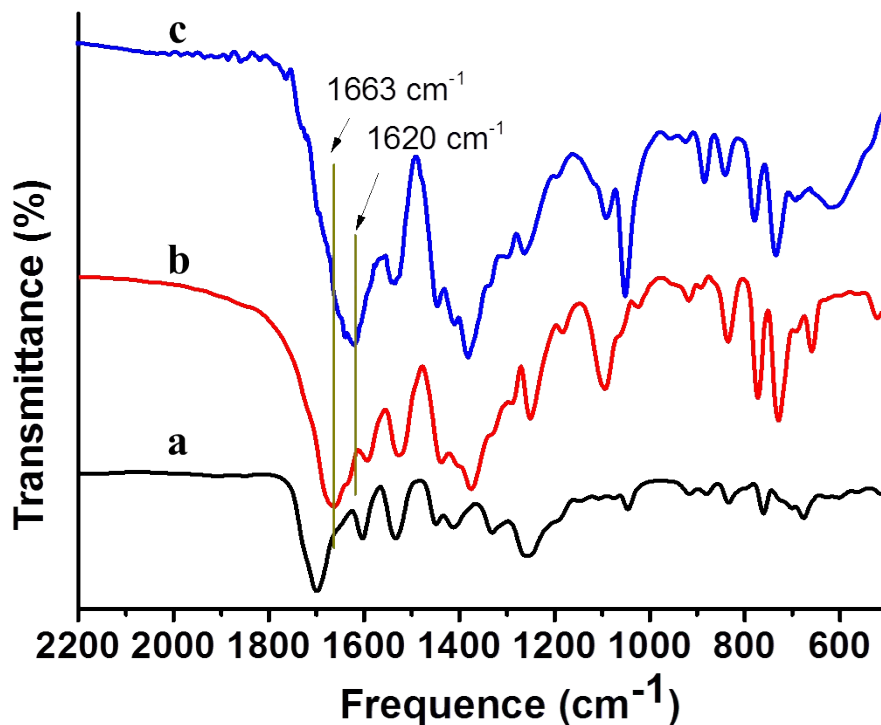

**Fig. S11** The IR spectra for **HNUST-8**. a) ligand, b) as-synthesized, and c) activated **HNUST-8**. Note the absence of the vibration frequencies of the solvent DMF and methanol molecules in the both activated samples. The frequencies at 1663  $\text{cm}^{-1}$  attributes to the  $\nu(\text{CO})$  vibration of the DMF, and the presence of the  $\nu(\text{OH})$  stretching frequencies at 1620  $\text{cm}^{-1}$  in activated samples may result from the rapid re-adsorption of trace moisture during the IR measurements.

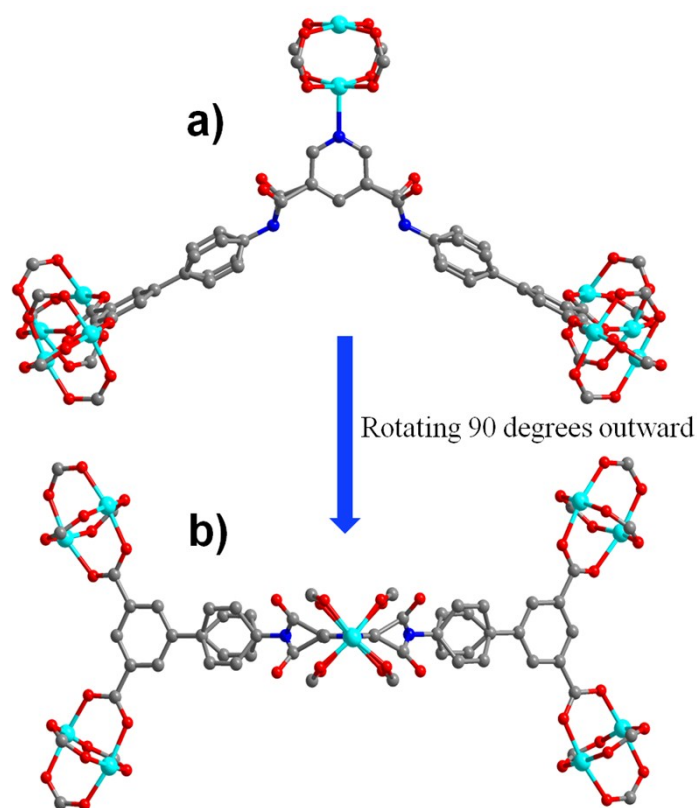

**Fig. S12** The acylamide and benzene moieties of the **PDBAD** ligand in the crystal structure of **HNUST-8** are disordered over two positions with equal probability.

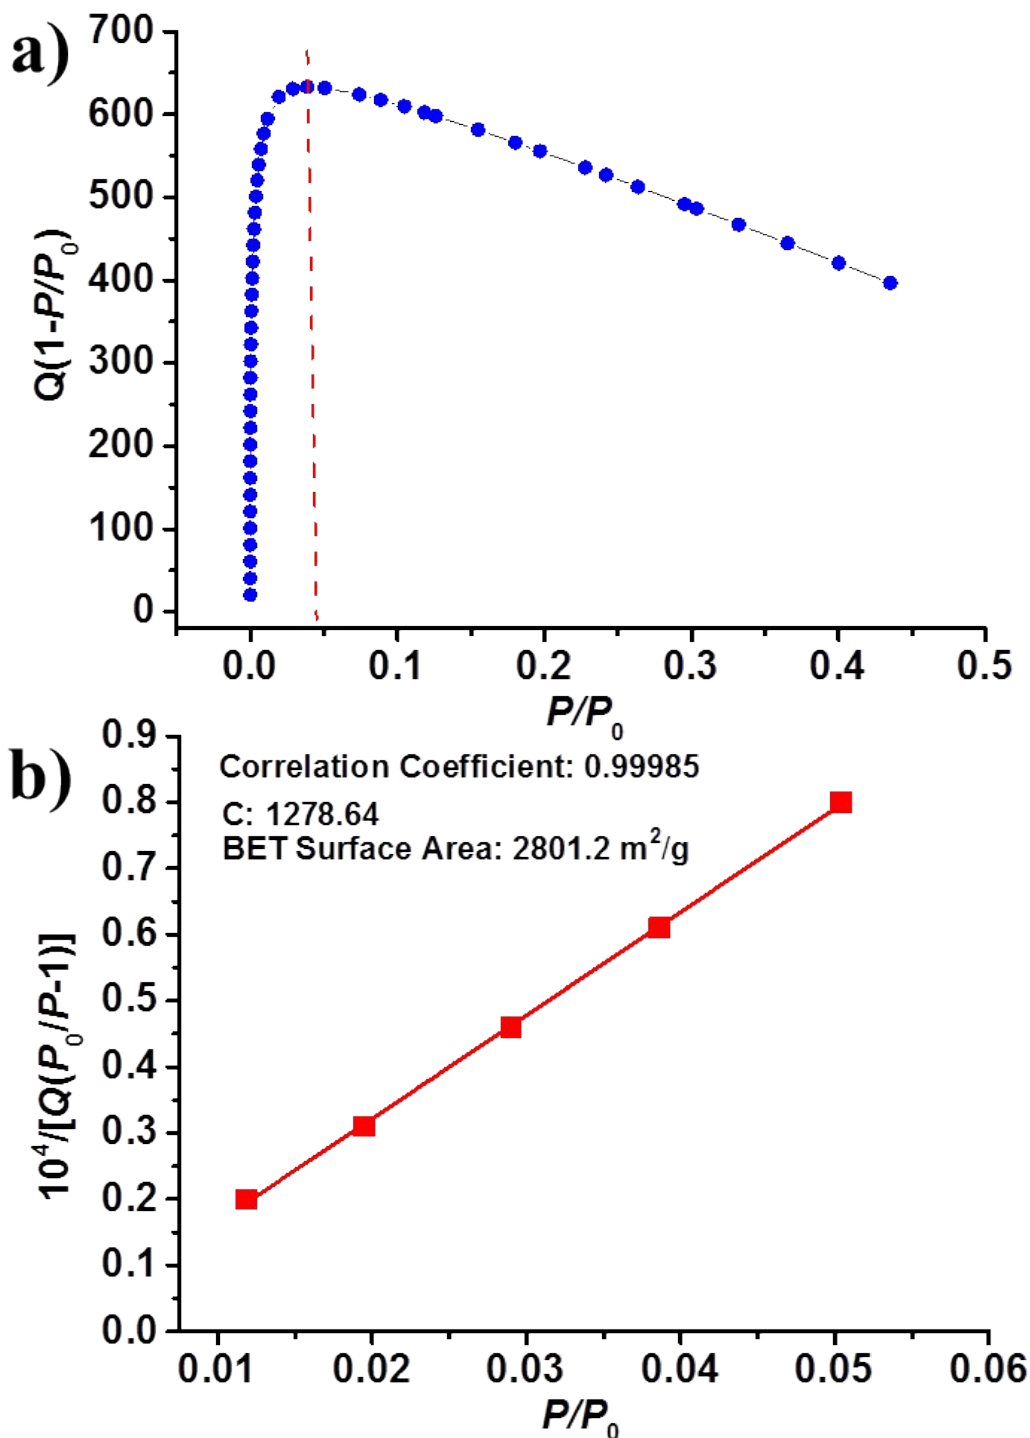

**Fig. S13** The BET plots for **HNUST-8** in the chosen range ( $P/P_0 = 0.01-0.05$ ). This range was chosen according to two major criteria established in literatures [(a) J. Rouquerol, P. Llewellyn and F. Rouquerol, *Stud. Surf. Sci. Catal.*, **2007**, 160, 49-56; (b) K. S. Walton and R. Q. Snurr, *J. Am. Chem. Soc.*, **2007**, 129, 8552 -8556.]: (1) The pressure range selected should have values of  $Q(P_0-P)$  increasing with  $P/P_0$ . (2) The y intercept of the linear region must be positive to yield a meaningful value of the C parameter, which should be greater than zero.
